# Supplementary material
Source: Springer Nature journal article supplement (https://www.springermedizin.de/resource/supplementary/13031_2010_64_MOESM1_ESM.pdf/9645038)

## Community of origin

(sub)cultural patterns  
of use  
(by age, gender,  
ethnic & religious  
affiliation)

## Displaced population

(sub)cultural patterns  
of use  
(by age, gender, ethnic  
& religious affiliation)

(sub)cultural patterns of use  
(by age, gender, ethnic & religious  
affiliation)

## Host community

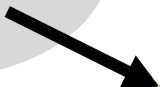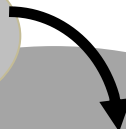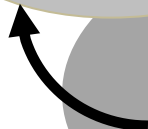

Supplement: MOESM1 [file 9645038]
